# Supplementary material for: Correlation of Plasmatic Amyloid Beta Peptides (Aβ-40, Aβ-42) with Myocardial Injury and Inflammatory Biomarkers in Acute Coronary Syndrome
Source: MDPI journal article supplement (doi:10.3390/jcm13041117), 2024-02-16
Supplement: s1 [file s1]

**Table S1.** (Additional analysis was calculated without outliers<sup>†</sup>). Shows the correlation between our study variables and A $\beta$  peptides (A $\beta$ -42, A $\beta$ -40), A $\beta$ -42/40 ratio in 57 patients with acute coronary syndrome. Data was analyzed using Spearman's correlation test (Additional analysis was calculated without outliers).

| Variable                             | A $\beta$ -42 (pg/ml) |         | A $\beta$ -40 (pg/ml) |         | A $\beta$ -42/40 ratio |         |
|--------------------------------------|-----------------------|---------|-----------------------|---------|------------------------|---------|
|                                      | Rho                   | p value | Rho                   | p value | Rho                    | p value |
| Age (years)                          | 0.191                 | 0.155   | 0.392                 | 0.003   | -0.316                 | 0.016   |
| BMI (Kg/m <sup>2</sup> )             | 0.034                 | 0.803   | -0.031                | 0.820   | -0.008                 | 0.951   |
| One or more SMuRF                    | 0.156                 | 0.246   | 0.231                 | 0.084   | -0.215                 | 0.108   |
| High sensitivity troponin I (pg/ml)  | -0.003                | 0.981   | 0.084                 | 0.536   | -0.091                 | 0.500   |
| CRP (mg/dl)                          | -0.006                | 0.965   | 0.028                 | 0.848   | -0.069                 | 0.636   |
| NT-proBNP                            | 0.289                 | 0.029   | 0.290                 | 0.029   | -0.177                 | 0.187   |
| Albumin (g/dl)                       | -0.160                | 0.311   | -0.045                | 0.775   | 0.105                  | 0.508   |
| Total cholesterol (mg/dl)            | -0.078                | 0.607   | 0.131                 | 0.386   | -0.092                 | 0.542   |
| HDL (mg/dl)                          | -0.075                | 0.613   | 0.101                 | 0.492   | -0.086                 | 0.559   |
| LDL (mg/dl)                          | -0.080                | 0.589   | 0.092                 | 0.536   | -0.051                 | 0.732   |
| Triglycerides                        | 0.132                 | 0.394   | 0.092                 | 0.552   | -0.028                 | 0.855   |
| AIP                                  | 0.138                 | 0.372   | 0.049                 | 0.751   | 0.003                  | 0.982   |
| Symptom-to-blood sample <sup>‡</sup> | -0.050                | 0.713   | -0.167                | 0.214   | 0.070                  | 0.606   |

<sup>†</sup> Outliers defined by **A $\beta$ -42** <20 pg/ml or >100 pg/ml, **A $\beta$ -40** >400 pg/ml, **A $\beta$ -42/40 ratio** <1.0 and **NT-proBNP** >10,000 pg/ml. <sup>‡</sup>Time between symptom onset and blood sample collection.

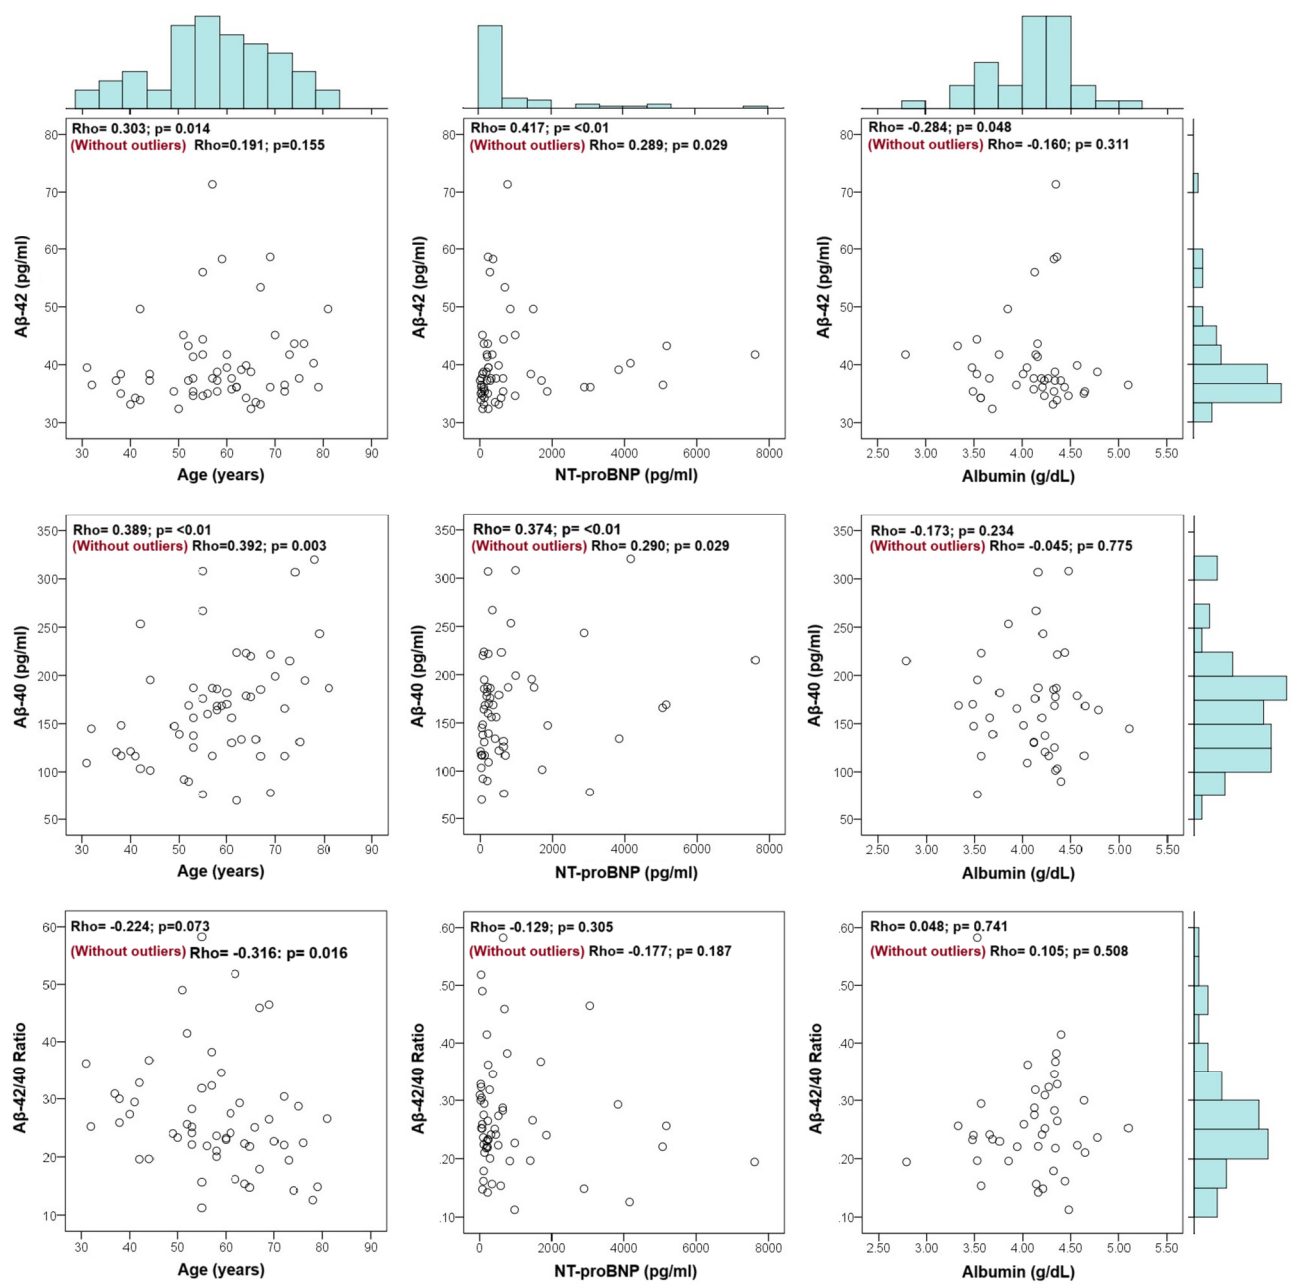

**Figure S1.** Correlation analysis without outliers. Scatterplot matrix and marginal histograms (with Spearman's correlation coefficients) showing the relation between **Aβ-42** vs age, NT-proBNP, and albumin (*top row*); **Aβ-40** vs age, NT-proBNP, and albumin (*middle row*); **Aβ-42/40 Ratio** vs age, NT-proBNP, and albumin (*bottom row*).

**Table S2.** (Additional analysis without outliers <sup>†</sup> was calculated). Demographic characteristics of 57 patients admitted to the coronary care unit grouped by ST elevation myocardial infarction (STEMI) or non-ST elevation myocardial infarction (NSTEMI). Data is shown as mean  $\pm$  standard deviation, median (percentile 25 – percentile 75), and absolute value (percentage)

| Variable                                               | STEMI<br>(N = 30) | NSTEMI<br>(N = 27)   | p value |
|--------------------------------------------------------|-------------------|----------------------|---------|
| Age (years)                                            | 57 $\pm$ 13       | 58 $\pm$ 12          | 0.747   |
| Sex                                                    |                   |                      | 0.177   |
| Male                                                   | 27 (87.1%)        | 20 (74.1%)           |         |
| Female                                                 | 4 (12.9%)         | 7 (25.9%)            |         |
| BMI (Kg/m <sup>2</sup> )                               | 28.35 $\pm$ 4.2   | 28.12 $\pm$ 3.78     | 0.826   |
| Overweight                                             | 13 (41.9%)        | 12 (44.4%)           |         |
| Obesity                                                | 11 (35.5%)        | 9 (33.3%)            |         |
| Overweight/Obesity                                     | 24 (77.4%)        | 21 (77.7%)           |         |
| Diabetes                                               | 3 (9.7%)          | 7 (25.9%)            | 0.099   |
| Hypertension                                           | 15 (48.4%)        | 20 (74.1%)           | 0.046   |
| Dyslipidemia                                           | 6 (19.4%)         | 6 (22.2%)            | 0.788   |
| Previous myocardial infarction                         | 7 (22.6%)         | 15 (55.6%)           | 0.010   |
| Smoking status                                         |                   |                      | 0.005   |
| Current smoker                                         | 15 (48.4%)        | 5 (18.5%)            |         |
| Former smoker                                          | 5 (16.1%)         | 15 (55.6%)           |         |
| Nonsmoker                                              | 11 (35.5%)        | 7 (25.9%)            |         |
| Number of SMuRFs                                       |                   |                      | 0.122   |
| One or more                                            | 25 (83.3%)        | 26 (96.3%)           |         |
| None                                                   | 5 (16.7%)         | 1 (3.7%)             |         |
| NYHA                                                   |                   |                      | 0.404   |
| $\geq 2$ Class                                         | 4 (12.9%)         | 2 (7.4%)             |         |
| Killip-Kimball                                         |                   |                      | 0.138   |
| $\geq 2$ Class                                         | 8 (25.8%)         | 3 (11.1%)            |         |
| GRACE                                                  |                   |                      | 0.658   |
| Intermediate-High Risk                                 | 19 (61.3%)        | 15 (55.5%)           |         |
| TIMI                                                   |                   |                      | 0.501   |
| Intermediate-High Risk                                 | 18 (58.1%)        | 18 (66.7%)           |         |
| CRUSADE                                                |                   |                      | 0.681   |
| Moderate-High Risk                                     | 11 (35.5%)        | 11 (40.7%)           |         |
| LVEF                                                   |                   |                      | 0.373   |
| Mid-range ejection fraction                            | 11 (36.7%)        | 7 (28.0%)            |         |
| Reduced ejection fraction                              | 7 (23.3%)         | 5 (20.0%)            |         |
| Symptom-to-door time (minutes)                         | 383 $\pm$ 193     | 284 $\pm$ 171        | 0.045   |
| Symptom-to-blood sample time <sup>‡</sup><br>(minutes) | 409 $\pm$ 197     | 366 $\pm$ 182        | 0.391   |
| Door-to-ECG time (minutes)                             | 6 (5-8)           | 5 (5-7)              | 0.113   |
| Door-to-balloon time (minutes)                         | 508 (95-2394)     | 2193 (1179-<br>4154) | 0.003   |
| Symptom-to-catheter time (minutes)                     | 1763 $\pm$ 1973   | 3180 $\pm$ 2612      | 0.049   |

<sup>†</sup> Outliers defined by **A $\beta$ -42** <20 pg/ml or >100 pg/ml, **A $\beta$ -40** >400 pg/ml, **A $\beta$ -42/40 ratio** <1.0 and **NT-proBNP** >10,000 pg/ml. <sup>‡</sup>Time between symptom onset and blood sample collection

**Table S3.** Biochemical values from 65 patients admitted to the coronary care unit grouped by ST elevation myocardial infarction (STEMI) or non-ST elevation myocardial infarction (NSTEMI). Data is shown as mean  $\pm$  standard deviation or median (percentile 25 – percentile 75)

| <b>Variable</b>        | <b>STEMI<br/>(N = 30)</b> | <b>NSTEMI<br/>(N = 27)</b> | <b>p value</b> |
|------------------------|---------------------------|----------------------------|----------------|
| A $\beta$ -42 (pg/ml)  | 35.96 (34.27-39.64)       | 41.76 (38.99-47.75)        | 0.001          |
| A $\beta$ -40 (pg/ml)  | 169.38 $\pm$ 88.26        | 183.68 $\pm$ 68.96         | 0.472          |
| A $\beta$ -42/40 ratio | 0.25 (0.21-0.30)          | 0.24 (0.20-0.38)           | 0.708          |

**Table S4.** (Additional analysis without outliers<sup>†</sup>) Biochemical values from 57 patients admitted to the coronary care unit grouped by ST elevation myocardial infarction (STEMI) or non-ST elevation myocardial infarction (NSTEMI). Data is shown as mean  $\pm$  standard deviation or median (percentile 25 – percentile 75)

| Variable                            | STEMI<br>(N = 30)    | NSTEMI<br>(N = 27)  | p value |
|-------------------------------------|----------------------|---------------------|---------|
| A $\beta$ -42 (pg/ml)               | 35.39 (34.27-37.64)  | 40.26 (37.64-45.13) | 0.001   |
| A $\beta$ -40 (pg/ml)               | 159.62 $\pm$ 49.59   | 172.26 $\pm$ 63.56  | 0.399   |
| A $\beta$ -42/40 ratio              | 0.24 $\pm$ 0.07      | 0.28 $\pm$ 0.12     | 0.118   |
| High sensitivity troponin I (pg/ml) | 354.0 (67.10-4742.0) | 247.0 (65.3-1021.0) | 0.315   |
| NT-proBNP (pg/ml)                   | 231.0 (74.6-642.0)   | 315.0 (194.0-978.0) | 0.161   |
| CRP (mg/dl)                         | 4.99 (2.65-9.41)     | 3.84 (0.99-7.52)    | 0.198   |
| Albumin (g/dl)                      | 4.14 $\pm$ 0.43      | 4.06 $\pm$ 0.46     | 0.540   |
| Total cholesterol (mg/dl)           | 172.5 $\pm$ 40.9     | 163.6 $\pm$ 32.7    | 0.434   |
| Triglycerides (mg/dl)               | 165.5 $\pm$ 65.4     | 162.9 $\pm$ 55.0    | 0.889   |
| HDL (mg/dl)                         | 38.5 $\pm$ 9.1       | 35.7 $\pm$ 8.0      | 0.273   |
| LDL (mg/dl)                         | 114.7 $\pm$ 39.2     | 102.1 $\pm$ 30.8    | 0.227   |
| AIP                                 | 0.25 $\pm$ 0.22      | 0.29 $\pm$ 0.15     | 0.472   |

<sup>†</sup> Outliers defined by **A $\beta$ -42** <20 pg/ml or >100 pg/ml, **A $\beta$ -40** >400 pg/ml, **A $\beta$ -42/40 ratio** <1.0 and **NT-proBNP** >10,000 pg/ml.
